# Supplementary material for: Alzheimer’s Disease Risk Polymorphisms Regulate Gene Expression in the ZCWPW1 and the CELF1 Loci
Source: PubMed Central journal article supplement (PMC4769299; doi:10.1371/journal.pone.0148717), 2016-02-26

# S1 Fig

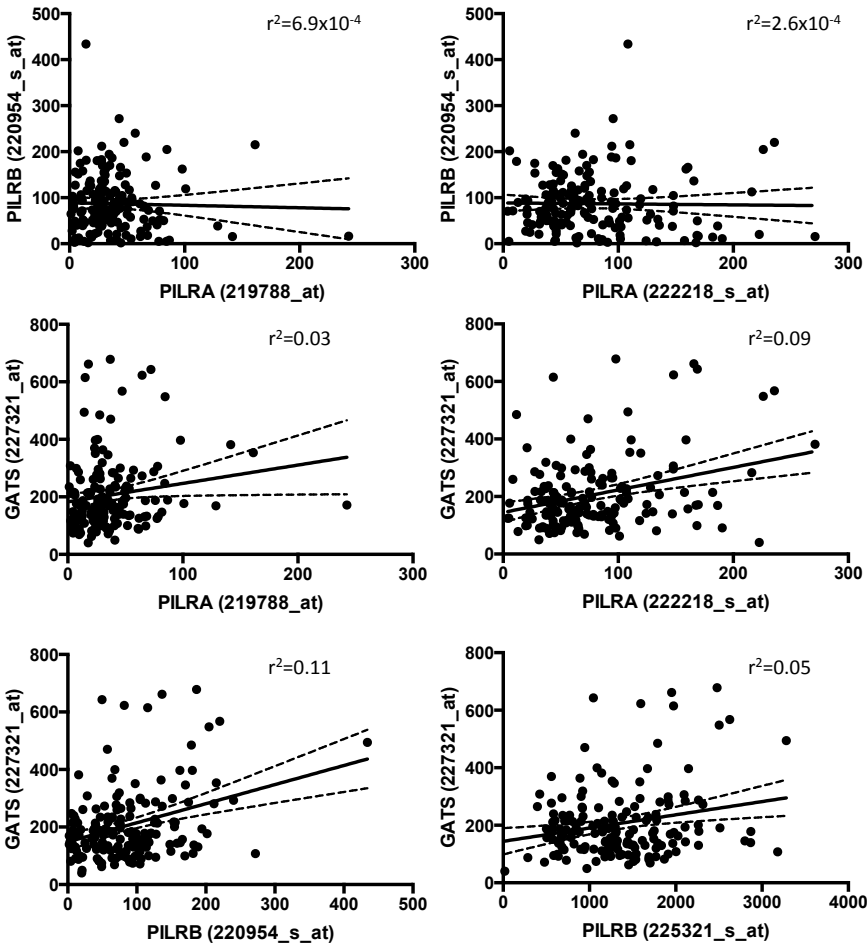

Supplement: pone.0148717.s001.pdf [file pone.0148717.s001.pdf]
